# Supplementary material
Source: publisher figshare collection journal article supplement (https://karger.figshare.com/ndownloader/files/24364289)
Supplement: Supplementary file 1 [file 24364289]

|  | *M. daubentonii* | *R. aegyptiacus* | *P. alecto** | *P. poliocephalus* |
| --- | --- | --- | --- | --- |
| Mean number of cells | 5933 | 169742 | 322855 | 255034 |
| SD | 1307 | 49069 |  | 8804 |
| CV | 0.220 | 0.289 |  | 0.035 |
| CE | 0.032 | 0.035 | 0.050 | 0.048 |
| CE2/CV2 | 0.021 | 0.015 |  | 1.938 |

*Since there was only one individual from *P. alecto* it was not possible to calculate SD and thus estimate CV and CE2/CV2

Table A1. Estimated mean number of cells, Standard Deviation (SD), Coefficient of Error (CE) and Coefficient of Variance (CV) per species.
